# Supplementary material for: Sensitive iodine speciation in seawater by multi-mode size-exclusion chromatography with sector-field ICP-MS
Source: Royal Society of Chemistry journal article supplement (doi:10.1039/c0ja00270d), 2011-01-01
Supplement: c0ja00270d.pdf [file c0ja00270d.pdf]

## Supporting Information

### **Sensitive iodine speciation in seawater by multi-mode size-exclusion chromatography with sector-field ICP-MS**

Jian Zheng<sup>\*</sup>, Masatoshi Yamada, Satoshi Yoshida

Environmental Radiation Effects Research Group  
National Institute of Radiological Sciences  
491 Anagawa, Inage, Chiba 263-8555 Japan  
Fax: 0081-43-255-0721  
[jzheng@nirs.go.jp](mailto:jzheng@nirs.go.jp)

---

\* Corresponding author. To whom correspondence should be addressed.

**Table 1S** Analytical results of total iodine and dissolved iodine species in seawater collected at Stn. 1 in the North Pacific off Aomori, Japan

| Depth (m) | TI ( $\mu\text{M}$ ) | $\text{IO}_3^-$ ( $\mu\text{M}$ ) | $\text{I}^-$ ( $\mu\text{M}$ ) | TII ( $\mu\text{M}$ ) | DOI ( $\mu\text{M}$ ) | Iodate (%) | Iodide (%) | DOI (%) |
|-----------|----------------------|-----------------------------------|--------------------------------|-----------------------|-----------------------|------------|------------|---------|
| 0         | 0.499 $\pm$ 0.010    | 0.331                             | 0.094                          | 0.425                 | 0.074                 | 66.3       | 18.8       | 14.9    |
| 5         | 0.495 $\pm$ 0.009    | 0.328                             | 0.100                          | 0.428                 | 0.066                 | 66.4       | 20.2       | 13.4    |
| 10        | 0.500 $\pm$ 0.010    | 0.389                             | 0.096                          | 0.485                 | 0.015                 | 77.7       | 19.3       | 3.0     |
| 20        | 0.497 $\pm$ 0.009    | 0.376                             | 0.065                          | 0.441                 | 0.055                 | 75.8       | 13.1       | 11.2    |
| 30        | 0.486 $\pm$ 0.006    | 0.385                             | 0.064                          | 0.449                 | 0.037                 | 79.2       | 13.1       | 7.7     |
| 40        | 0.502 $\pm$ 0.013    | 0.345                             | 0.066                          | 0.412                 | 0.091                 | 68.8       | 13.2       | 18.1    |
| 50        | 0.504 $\pm$ 0.009    | 0.366                             | 0.065                          | 0.431                 | 0.073                 | 72.8       | 12.8       | 14.4    |
| 60        | 0.503 $\pm$ 0.006    | 0.370                             | 0.062                          | 0.432                 | 0.071                 | 73.6       | 12.3       | 14.2    |
| 75        | 0.483 $\pm$ 0.007    | 0.378                             | 0.059                          | 0.437                 | 0.046                 | 78.3       | 12.2       | 9.5     |
| 100       | 0.503 $\pm$ 0.017    | 0.379                             | 0.058                          | 0.437                 | 0.066                 | 75.4       | 11.5       | 13.1    |
| 150       | 0.505 $\pm$ 0.008    | 0.361                             | 0.057                          | 0.418                 | 0.087                 | 71.5       | 11.3       | 17.2    |
| 200       | 0.514 $\pm$ 0.012    | 0.382                             | 0.044                          | 0.426                 | 0.087                 | 74.4       | 8.6        | 17.0    |
| 250       | 0.509 $\pm$ 0.020    | 0.401                             | 0.044                          | 0.445                 | 0.063                 | 78.9       | 8.7        | 12.4    |
| 300       | 0.507 $\pm$ 0.007    | 0.392                             | 0.042                          | 0.433                 | 0.074                 | 77.3       | 8.2        | 14.5    |
| 500       | 0.527 $\pm$ 0.010    | 0.403                             | 0.041                          | 0.444                 | 0.083                 | 76.5       | 7.8        | 15.7    |
| 700       | 0.537 $\pm$ 0.013    | 0.413                             | 0.009                          | 0.423                 | 0.114                 | 77.0       | 1.7        | 21.3    |

TI: total iodine; TII: total inorganic iodine, which equals to the sum of iodate and iodide concentrations. DOI: dissolved organic iodine. Concentrations of iodate and iodide are the mean of duplicate determinations. DOI was calculated from the difference between TI and TII. TI was obtained with triplicate measurements. Concentrations of  $\text{IO}_3^-$  and  $\text{I}^-$  were obtained with duplicate measurements.

**Table 2S** Comparison of inorganic iodate and iodide separation using different chromatographic columns

| Column               | Separation mode                     | Mobile phase                                        | IO <sub>3</sub> <sup>-</sup> RT(s) | I <sup>-</sup> RT(s) |
|----------------------|-------------------------------------|-----------------------------------------------------|------------------------------------|----------------------|
| IonPac CG 5A         | cation-exchange                     | 30 mM ammonium bicarbonate, 1.1 ml/min              | 23 ± 1                             | 183 ± 1              |
| ICS-A2H              | anion-exchange                      | 30 mM ammonium bicarbonate, 1.1 ml/min              | 19 ± 1                             | 98 ± 1               |
| IonPac CG 5A+ICS-A2H | cation-exchange +anion-exchange     | 30 mM ammonium bicarbonate, 1.1 ml/min              | 36 ± 1                             | 272 ± 2              |
| ExcelPak ICS-A23     | anion-exchange                      | 30 mM ammonium bicarbonate, 1.1 ml/min              | 144 ± 1                            | 867 ± 1              |
| TCC2                 | cation concentrator                 | 30 mM ammonium bicarbonate, 1.1 ml/min              | 11 ± 1                             | 12 ± 1               |
| TCC2+ICS-A2H         | cation concentrator +anion-exchange | 30 mM ammonium bicarbonate, 1.1 ml/min              | 25 ± 1                             | 105 ± 1              |
| AsahiPak GS-220 7C   | multi-mode size-exclusion           | 50 mM malonic acid-37.5 mM TMAH, pH 6.9; 1.0 ml/min | 157 ± 1                            | 312 ± 1              |

\*RT: retention time, measured with 3 consecutive analyses.

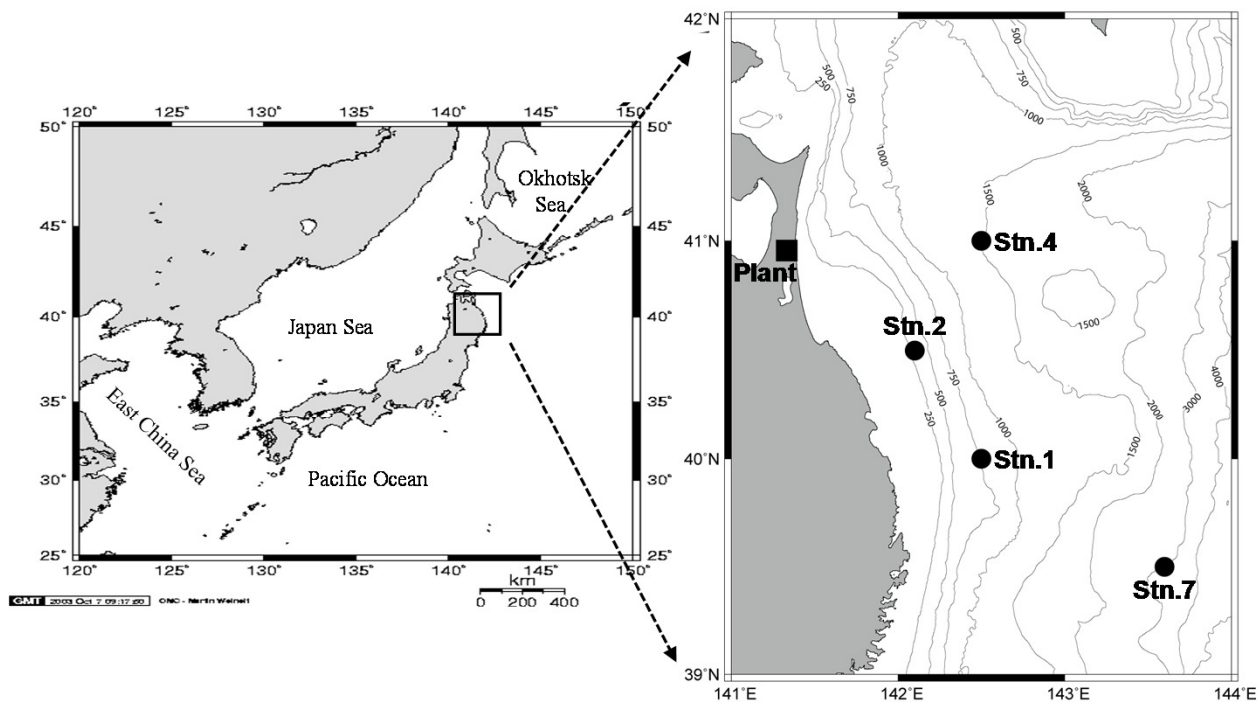

**Fig. 1S** Map showing the location sites for coastal seawater samples and the location of nuclear fuel reprocessing plant. Seawater samples of Stn. 1 were used in this study for iodine speciation, and samples from other stations were used for the analysis of radionuclides, such as  $^{99}\text{Tc}$ ,  $^{137}\text{Cs}$  and Pu isotopes.

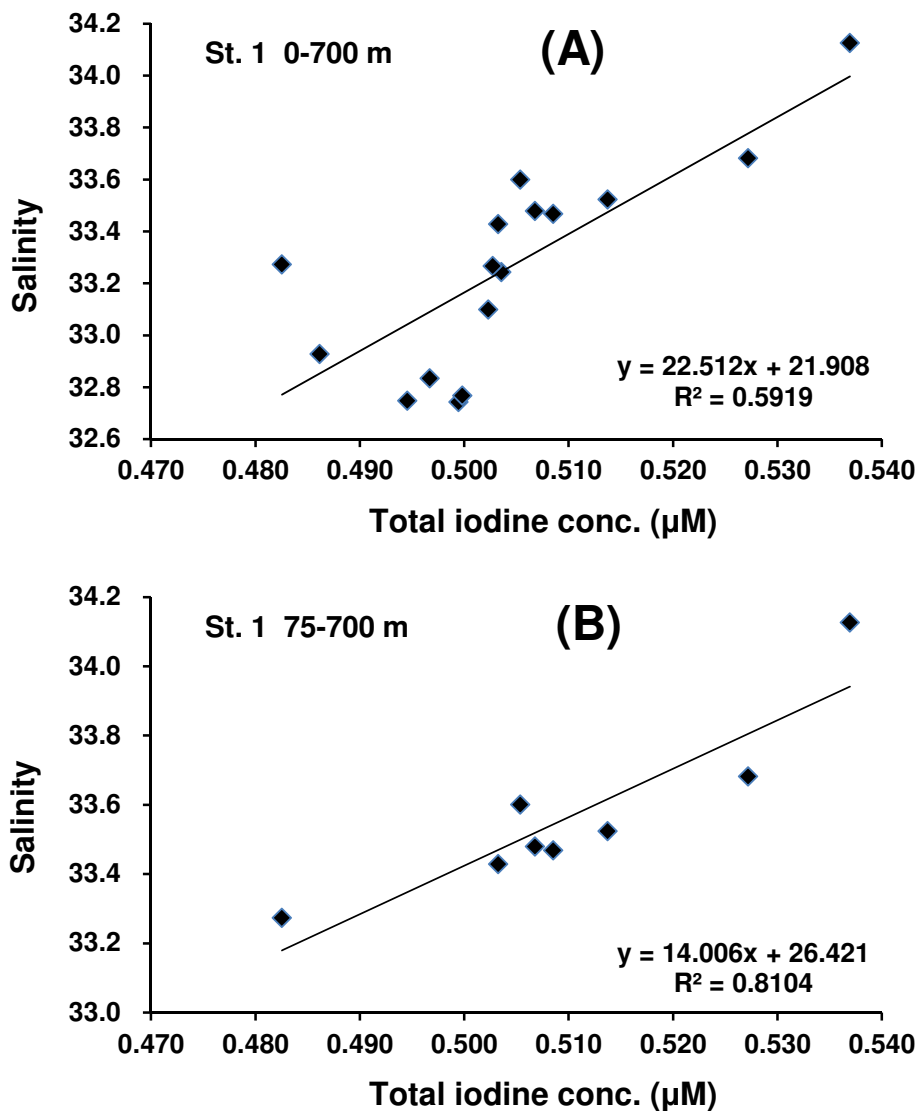

**Fig. 2S** Correlation between salinity and total iodine concentrations. (A) In the whole water column (0-700 m); (B) For the depths of 75-700 m. Total iodine concentrations were obtained with triplicate measurements using SF-ICP-MS.
